# Supplementary material for: The emerging spectrum of COVID-19 neurology: clinical, radiological and laboratory findings
Source: Oxford University Press journal article supplement (doi:10.1093/brain/awaa240), 2020-07-03
Supplement: awaa240_supplementary_data.pdf [file awaa240_supplementary_data.pdf]

## The emerging spectrum of COVID-19 neurology: clinical, radiological and laboratory findings

### Supplementary Table. Demographic, clinical, radiological, laboratory and neuropathological characteristics of forty-three patients with definite, probable and possible COVID-19 infection with central and peripheral neurological syndromes.

Table S1a: Ten patients with encephalopathy (delirium and psychosis)

Table S1b: Twelve patients with inflammatory CNS syndromes (encephalitis, para- and post- infectious) (2 parts)

Table S1c. Demographic, clinical, radiological, laboratory and characteristics of eight individuals with possible and definite COVID-19 infection with ischaemic stroke

Table S1d. Demographic, clinical, radiological, laboratory and characteristics of individuals with possible and definite COVID-19 infection with peripheral neurological syndromes

Table S1e. Five miscellaneous and uncharacterised patients.

Abbreviations used in Tables. CADASIL – Cerebral autosomal dominant arteriopathy with subcortical infarcts and leukoencephalopathy; TIA – transient ischaemic attack; ICU – intensive care unit; N/A – not applicable; Hb – haemoglobin; MCV – mean corpuscular volume; Lymphs – lymphocytes; Neuts – neutrophils; Plt – platelets; ESR – erythrocyte sedimentation rate; CRP – C-reactive protein; NR – no result; TSH – thyroid stimulating hormone; NMDA receptor – N-methyl-D-aspartate receptor; CSF – cerebrospinal fluid; PCR – polymerase chain reaction; CT – computed tomography; MRI – magnetic resonance imaging; CXR – chest X-ray; CTPA – CT pulmonary angiogram; ARDS – acute respiratory distress syndrome; EEG – electroencephalogram; IV – intravenous; IVMP – intravenous methylprednisolone; CPAP – continuous positive airway pressure; ADEM – acute demyelinating encephalomyelitis; MGUS – monoclonal gammopathy of undetermined significance; ANA – anti-nuclear antibodies; ANCA – anti-neutrophil cytoplasmic antibodies; ENA – extractable nuclear antigens; IgG – Immunoglobulin G; GAD – glutamic acid decarboxylase; DPPX - dipeptidyl-peptidase-like protein 6; LGI1 – leucine-rich glioma-inactivated 1; CASPR2 – contactin-associated protein-like 2; MOG – myelin oligodendrocyte glycoprotein; AQP4 – aquaporin-4; FDG PET – fluorodeoxyglucose positron emission tomography; IVIG – intravenous immunoglobulin; JPS – joint position sense; HTLV 1 and 2 – human T-cell leukaemia virus types 1 and 2; EMG – electromyogram; ICP – intracranial pressure; DVT – deep vein thrombosis; PPM – permanent pacemaker; AF – atrial fibrillation, MCA – middle cerebral artery; ACA – anterior cerebral artery; PCA – posterior cerebral artery; mRS – modified Rankin Scale; NHISS – National Institute for Health Stroke Scale; CTA – CT angiogram; PE pulmonary embolism; APTT – activated partial thromboplastin time; IgM – immunoglobulin M; LDL – low density lipoprotein; HDL – high density lipoprotein; GBS – Guillian Barre syndrome; Hep E – hepatitis E; NAD – no abnormality detected; GORD – gastro oesophageal reflux disease; AML – acute myeloid leukaemia; QDS – four times daily; EVD – external ventricular drain

*Standard viral PCR – herpes simplex viruses, varicella zoster, enterovirus +/- adenovirus, cytomegalovirus, Epstein-Barr Virus, parechovirus depending upon NHS trust/centre; N-Gene PCR (unvalidated test) for SARS-CoV-2 testing in CSF only where specified.*

**Supplementary Table. Demographic, clinical, radiological, laboratory and neuropathological characteristics of forty-three patients with definite, probable and possible COVID-19 infection with central and peripheral neurological syndromes.**

**S1a: Ten patients with encephalopathy (delirium and psychosis)**

| Patient                                         | 1                                             | 2                                                  | 3                                            | 4                                                       | 5                          | 6                      | 7                                                    | 8                    | 9                                                     | 10                                        |
|-------------------------------------------------|-----------------------------------------------|----------------------------------------------------|----------------------------------------------|---------------------------------------------------------|----------------------------|------------------------|------------------------------------------------------|----------------------|-------------------------------------------------------|-------------------------------------------|
| Age (years)                                     | 65                                            | 72                                                 | 59                                           | 58                                                      | 52                         | 39                     | 55                                                   | 68                   | 50                                                    | 57                                        |
| Gender (M/F)                                    | F                                             | M                                                  | F                                            | M                                                       | F                          | F                      | F                                                    | M                    | F                                                     | M                                         |
| Ethnicity                                       | White                                         | White                                              | Black                                        | Black                                                   | White                      | Asian                  | White                                                | Black                | Black                                                 | Black                                     |
| Final neurological diagnosis                    | Hypoactive delirium                           | Hypoactive delirium                                | Delirium                                     | Delirium                                                | Delirium                   | Delirium               | Delirium and psychosis                               | Hyperactive delirium | Generalised tonic clonic seizures with encephalopathy | Encephalopathy with myelopathy and ataxia |
| Past medical history                            | CADASIL; previous right occipital stroke; TIA | Bladder cancer; nephrectomy; hypercholesterolaemia | Hypertension; diabetes                       | Prostate cancer in remission; musculoskeletal back pain | None                       | Hypertension           | None                                                 | None                 | None                                                  | Hypertension; diabetes; asthma            |
| Initial COVID-19 symptoms                       | Cough; fever                                  | Confusion; fever                                   | Diarrhoea; vomiting; fever; cough; confusion | Confusion; cough; fever; dysgeusia                      | Fever; lethargy; confusion | Fever; cough; dyspnoea | Cough; dyspnoea; fever; myalgia; anosmia; hypogeusia | Fever                | Cough; household contacts with COVID-19 symptoms      | Cough; dyspnoea; fever; myalgia           |
| <b>Days from onset of COVID-19 symptoms to:</b> |                                               |                                                    |                                              |                                                         |                            |                        |                                                      |                      |                                                       |                                           |
| 1) Hospital admission                           | 15                                            | 4                                                  | 7                                            | 4                                                       | 3                          | 7                      | 1st 14; 2nd 17                                       | 1                    | 21                                                    | 6                                         |
| 2) Onset of neurological symptoms               | 14                                            | 1                                                  | 3                                            | 1                                                       | -1                         | 19                     | 17                                                   | -4                   | 21                                                    | 6                                         |
| 3) ICU admission                                | N/A                                           | 6                                                  | N/A                                          | N/A                                                     | N/A                        | 7                      | N/A                                                  | N/A                  | N/A                                                   | N/A                                       |
| Main reason for hospital admission              | Neurological                                  | Both                                               | Neurological                                 | Neurological                                            | Neurological               | Respiratory            | 1st Respiratory; 2nd Neurological                    | Neurological         | Neurological                                          | Both                                      |

|                                                                                       |                                                                                                                   |                                                           |                                                               |                                                                                                    |                                              |                                                                                                           |                                                                                                    |                                                                                                                           |                                                         |                                                                                                         |
|---------------------------------------------------------------------------------------|-------------------------------------------------------------------------------------------------------------------|-----------------------------------------------------------|---------------------------------------------------------------|----------------------------------------------------------------------------------------------------|----------------------------------------------|-----------------------------------------------------------------------------------------------------------|----------------------------------------------------------------------------------------------------|---------------------------------------------------------------------------------------------------------------------------|---------------------------------------------------------|---------------------------------------------------------------------------------------------------------|
| <b>sion (neurological vs respiratory symptoms)</b>                                    |                                                                                                                   |                                                           |                                                               |                                                                                                    |                                              |                                                                                                           |                                                                                                    |                                                                                                                           |                                                         |                                                                                                         |
| <b>Security of COVID-19 diagnosis (definite, probable, possible)</b>                  | Definite                                                                                                          | Definite                                                  | Definite                                                      | Definite                                                                                           | Probable                                     | Definite                                                                                                  | Definite                                                                                           | Definite                                                                                                                  | Probable                                                | Definite                                                                                                |
| <b>Severity of COVID-19 infection</b>                                                 | Mild                                                                                                              | Critical                                                  | Mild                                                          | Mild                                                                                               | Mild                                         | Critical                                                                                                  | Severe                                                                                             | Mild                                                                                                                      | Mild                                                    | Severe                                                                                                  |
| <b>Duration of ICU stay (days)</b>                                                    | N/A                                                                                                               | 13                                                        | N/A                                                           | N/A                                                                                                | N/A                                          | 16                                                                                                        | N/A                                                                                                | N/A                                                                                                                       | N/A                                                     | N/A                                                                                                     |
| <b>Initial neurological symptoms</b>                                                  | Fluctuating confusion; reversal of sleep-wake cycle                                                               | Confusion; malaise; loss of appetite                      | Fluctuating confusion                                         | Confusion; nonsensical speech; repetitive behaviour; disorientation; delusional thoughts; headache | Fluctuating consciousness; delirium          | Delirium; hallucinations about experiences in countries not previously visited; reversed sleep/wake cycle | Confusion; agitation; persecutory delusions; visual hallucinations; combative behaviour; headaches | Cognitive impairment; gait disturbance; two falls                                                                         | Seizures                                                | Double incontinence; progressive lower > upper limb weakness; disorientation; word finding difficulties |
| <b>Key neurological signs</b>                                                         | Disorientated to time and place; impaired insight, bradyphrenia; polyminimyclonus; old left homonymous hemianopia | Cognitive impairment; increased limb tone; brisk reflexes | Fluctuating attention and cognition; bradyphrenia; dyspraxia. | Bilateral intention tremor; heel-shin ataxia                                                       | Cognitive impairment; reduced verbal fluency | Cognitive impairment                                                                                      | No focal signs                                                                                     | Disorientation; intermittent agitation; unable to follow commands; speaking a few words only; bilateral extensor plantars | Post-ictal drowsiness and transient disorientation only | Pyramidal tract signs; extensor plantars; mild upper limb dysmetria                                     |
| <b>Initial laboratory results at or nearest to time of neurological symptom onset</b> |                                                                                                                   |                                                           |                                                               |                                                                                                    |                                              |                                                                                                           |                                                                                                    |                                                                                                                           |                                                         |                                                                                                         |
| Hb (g/L; 130-170)                                                                     | 130                                                                                                               | 147                                                       | 118                                                           | 162                                                                                                | 107                                          | 86                                                                                                        | 113                                                                                                | 137                                                                                                                       | 113                                                     | 172                                                                                                     |
| MCV (fL; 80-99)                                                                       | 84.4                                                                                                              | 95.4                                                      | 70.3                                                          | 79.4                                                                                               | 89                                           | 89.8                                                                                                      | 85                                                                                                 | 73.9                                                                                                                      | 97.2                                                    | 93.3                                                                                                    |
| Lymphs (x10 <sup>9</sup> /L; 1.2-3.65)                                                | 1.47                                                                                                              | 0.43                                                      | 2.31                                                          | 0.26                                                                                               | 0.91                                         | 1.16                                                                                                      | 1.42                                                                                               | 1.39                                                                                                                      | 4.48                                                    | 0.69                                                                                                    |

|                                    |      |      |      |                                                         |          |      |                                                                     |      |      |      |
|------------------------------------|------|------|------|---------------------------------------------------------|----------|------|---------------------------------------------------------------------|------|------|------|
| Neuts (x10 <sup>9</sup> /L; 2-7.5) | 5.97 | 4.09 | 5.09 | 9.93                                                    | 5.74     | 9.52 | 4.26                                                                | 3.29 | 4.65 | 2.29 |
| Plt (x10 <sup>9</sup> /L; 150-400) | 479  | 106  | 276  | 191                                                     | 158      | 599  | 454                                                                 | 123  | 379  | 81   |
| ESR (mm/hr; 1-20)                  | NR   | NR   | NR   | NR                                                      | 61       | 143  | NR                                                                  | NR   | NR   | NR   |
| CRP (mg/L; 0-5.0)                  | 58.3 | 64.6 | 38.1 | 168.1                                                   | 56       | 14.8 | 37.9                                                                | 38   | 8.9  | 85.5 |
| Fibrinogen (g/L; 1.5-4.0)          | NR   | NR   | NR   | NR                                                      | 4.6      | 8    | 7.82                                                                | NR   | NR   | NR   |
| D-Dimer (µg/L; 0-550)              | 1190 | 1730 | NR   | 970                                                     | NR       | 2430 | 1200                                                                | NR   | NR   | 1410 |
| Ferritin (µg/L; 30-400)            | 721  | 1306 | 425  | 3285                                                    | 393      | 969  | 1291                                                                | NR   | 281  | 1563 |
| Phospholipid antibodies            | NR   | NR   | NR   | NR                                                      | Negative | NR   | NR                                                                  | NR   | NR   | NR   |
| Lupus anticoagulant                | NR   | NR   | NR   | NR                                                      | NR       | NR   | NR                                                                  | NR   | NR   | NR   |
| Other relevant results             |      |      |      | Free T4 24.2 (normal range 12-22), TSH 0.07 (0.27-4.20) |          |      | Significant negative results: neuronal and NMDA receptor antibodies |      |      |      |
| <b>CSF:</b>                        |      |      |      |                                                         |          |      |                                                                     |      |      |      |
| White cell count (cells/µL; 0-5)   | NR   | NR   | 3    | 2                                                       | NR       | NR   | <1                                                                  | 3    | <1   | <1   |
| Protein (g/L; 0.13-0.45)           | NR   | NR   | 0.52 | Insufficient                                            | NR       | NR   | 0.18                                                                | 0.4  | 0.43 | 0.36 |

|                                                             |                                                    |                                                                                       |                                                                                                                         |                                    |                                                                                                                                                            |                                                                                                    |                                                                                                                                |                                                            |                                                                                                      |                                                                                                          |
|-------------------------------------------------------------|----------------------------------------------------|---------------------------------------------------------------------------------------|-------------------------------------------------------------------------------------------------------------------------|------------------------------------|------------------------------------------------------------------------------------------------------------------------------------------------------------|----------------------------------------------------------------------------------------------------|--------------------------------------------------------------------------------------------------------------------------------|------------------------------------------------------------|------------------------------------------------------------------------------------------------------|----------------------------------------------------------------------------------------------------------|
| Glucose (mmol/L; 2.2-4.2) (blood glucose) (mmol/L; 3.9-5.8) | NR                                                 | NR                                                                                    | NR                                                                                                                      | 3.17 (5.9)                         | NR                                                                                                                                                         | NR                                                                                                 | 3.5 (5.0)                                                                                                                      | 3.7 (5.3)                                                  | NR                                                                                                   | 3.7 (6.0)                                                                                                |
| Other                                                       |                                                    |                                                                                       | CSF culture and viral PCR negative                                                                                      | CSF culture and viral PCR negative |                                                                                                                                                            |                                                                                                    | CSF culture and viral PCR negative                                                                                             | CSF culture and viral PCR negative                         | Oligoclonal bands negative; CSF culture and viral PCR negative                                       | Matched oligoclonal bands in serum and CSF; CSF culture and viral PCR negative                           |
| <b>Micro/virology</b>                                       | Blood, urine and sputum cultures negative          | Blood and urine cultures negative                                                     | Blood cultures negative                                                                                                 | Blood and urine cultures negative  |                                                                                                                                                            |                                                                                                    | Blood and urine cultures negative                                                                                              |                                                            | Screening for other respiratory viruses negative                                                     | Blood, urine, stool cultures all negative                                                                |
| <b>Imaging</b>                                              |                                                    |                                                                                       |                                                                                                                         |                                    |                                                                                                                                                            |                                                                                                    |                                                                                                                                |                                                            |                                                                                                      |                                                                                                          |
| Neuroaxis                                                   | CT head - no acute changes                         | CT head - small vessel disease, no acute changes                                      | CT head - small vessel disease                                                                                          | MRI brain normal                   | CT head - calcification consistent with Fahr's disease;<br>MRI brain – consistent with CT small foci of restricted diffusion in the both centrum semiovale | MRI brain - focal non-specific T2/FLAIR-hyperintensities within globi pallidi bilaterally          | MRI brain normal                                                                                                               | MRI brain normal                                           | MRI brain normal                                                                                     | MRI brain - mild to moderate small vessel disease, MRI spine - multilevel degenerative disc disease only |
| Chest                                                       | CXR - bilateral infiltrates suggestive of COVID-19 | CXR - progressive bilateral, symmetrical nodular infiltrates consistent with COVID-19 | CXR – ill-defined bibasal infiltrates and peripheral airspace opacification left lower zone; indeterminate for COVID-19 | CXR - normal                       | CXR – peripheral airspace opacification consistent with COVID-19                                                                                           | CTPA – extensive bilateral ground glass appearance and consolidation consistent with COVID-19 ARDS | CT chest – bilateral subpleural ill-defined ground-glass opacities and interlobular septal thickening consistent with COVID-19 | CXR - bibasal infiltrates; CT chest - ground glass changes | CXR - ill-defined peripheral airspace opacification in both lungs, in keeping with probable COVID-19 | CXR - Bilateral lower lobe opacities consistent with COVID-19                                            |
| <b>Other relevant investigations</b>                        |                                                    |                                                                                       |                                                                                                                         |                                    |                                                                                                                                                            |                                                                                                    |                                                                                                                                |                                                            |                                                                                                      |                                                                                                          |
| Neurophysiology                                             |                                                    |                                                                                       |                                                                                                                         |                                    |                                                                                                                                                            |                                                                                                    | EEG within normal limits                                                                                                       | EEG within normal limits                                   |                                                                                                      |                                                                                                          |

| <b>Treatment</b>                            |                                    |                                                                     |                                    |                                    |                                    |                                                                    |                                                  |                                                                 |                                                  |                                    |
|---------------------------------------------|------------------------------------|---------------------------------------------------------------------|------------------------------------|------------------------------------|------------------------------------|--------------------------------------------------------------------|--------------------------------------------------|-----------------------------------------------------------------|--------------------------------------------------|------------------------------------|
| For neurological diagnosis                  | Supportive                         | Supportive                                                          | Supportive                         | Supportive                         | Supportive                         | Melatonin                                                          | Haloperidol; risperidone                         | 1g IVMP 3 days for initial suspicion of autoimmune encephalitis | IV lorazepam acutely for seizures; levetiracetam | Supportive                         |
| For COVID-19 infection                      | None required                      | CPAP                                                                | None required                      | None required                      | None required                      | Intubation and ventilation                                         | Oxygen                                           | None required                                                   | None required                                    | Oxygen                             |
| <b>Outcomes</b>                             |                                    |                                                                     |                                    |                                    |                                    |                                                                    |                                                  |                                                                 |                                                  |                                    |
| Total duration of hospital admission (days) | 8                                  | 39                                                                  | 14                                 | 4                                  | 12                                 | 20                                                                 | 23                                               | Ongoing                                                         | 2                                                | 12                                 |
| Outcome at last follow up                   | Complete recovery; discharged home | Complete recovery of confusion; discharged to rehabilitation centre | Complete recovery; discharged home | Complete recovery; discharged home | Complete recovery; discharged home | Incomplete recovery; ongoing cognitive impairment; discharged home | Significant recovery; improving; discharged home | Ongoing admission; receiving treatment                          | Complete recovery; discharged home               | Complete recovery; discharged home |



|                                                                                       |                                                                                                                                                           |                                                                                      |                                                                   |                                                                                        |                                                                                                                                   |                                                                                                                                                |
|---------------------------------------------------------------------------------------|-----------------------------------------------------------------------------------------------------------------------------------------------------------|--------------------------------------------------------------------------------------|-------------------------------------------------------------------|----------------------------------------------------------------------------------------|-----------------------------------------------------------------------------------------------------------------------------------|------------------------------------------------------------------------------------------------------------------------------------------------|
| <b>Severity of COVID-19 infection</b>                                                 | Severe                                                                                                                                                    | Mild                                                                                 | Critical                                                          | Critical                                                                               | Mild                                                                                                                              | Critical                                                                                                                                       |
| <b>Duration of ICU stay (days)</b>                                                    | N/A                                                                                                                                                       | N/A                                                                                  | 35                                                                | 35                                                                                     | 9                                                                                                                                 | 14                                                                                                                                             |
| <b>Initial neurological symptoms</b>                                                  | 'Shaking'; confusion; hallucinations; reported being 'cross-eyed'; dysarthria                                                                             | Confusion; single generalised seizure                                                | Slow to wake in ICU                                               | Slow to wake in ICU                                                                    | Recurrent fleeting episodes of vacant staring and speech arrest; generalised tonic-clonic seizures; headache; low conscious level | Headache; back pain; vomiting; progressive limb weakness                                                                                       |
| <b>Key neurological signs</b>                                                         | Perseveration; opsoclonus; convergence spasm; bilateral ocular-facial synkinesis; dysarthria; orofacial apraxia; generalised stimulus-sensitive myoclonus | Low conscious level post-ictally lasting 48 hours; brisk reflexes; extensor plantars | Low conscious level; withdrawal to pain; hyperreflexia and clonus | Low conscious level; opening eyes to voice; withdrawal to pain; right extensor plantar | Left pupil unreactive at nadir; left extensor plantar                                                                             | Flaccid four limb weakness, proximal > distal; facial and neck weakness; areflexia; extensor plantars, normal sensation; ophthalmoplegia day 3 |
| <b>Initial laboratory results at or nearest to time of neurological symptom onset</b> |                                                                                                                                                           |                                                                                      |                                                                   |                                                                                        |                                                                                                                                   |                                                                                                                                                |
| Hb (g/L; 130-170)                                                                     | 113                                                                                                                                                       | 119                                                                                  | 86                                                                | 93                                                                                     | 105                                                                                                                               | 155                                                                                                                                            |
| MCV (fL; 80-99)                                                                       | 95.5                                                                                                                                                      | 81.5                                                                                 | 73.1                                                              | 96                                                                                     | 90                                                                                                                                | 91                                                                                                                                             |
| Lymphs (x10 <sup>9</sup> /L; 1.2-3.65)                                                | 1.68                                                                                                                                                      | 0.4                                                                                  | 3.07                                                              | 0.95                                                                                   | 0.3                                                                                                                               | 1.07                                                                                                                                           |
| Neuts (x10 <sup>9</sup> /L; 2-7.5)                                                    | 11.02                                                                                                                                                     | 5.58                                                                                 | 13.96                                                             | 12.79                                                                                  | 2.7                                                                                                                               | 5.01                                                                                                                                           |
| Plt (x10 <sup>9</sup> /L; 150-400)                                                    | 759                                                                                                                                                       | 193                                                                                  | 760                                                               | 370                                                                                    | 29 (premorbid baseline 33)                                                                                                        | 254                                                                                                                                            |
| ESR (mm/hr; 1-20)                                                                     | 76                                                                                                                                                        | NR                                                                                   | NR                                                                | NR                                                                                     | NR                                                                                                                                | 22                                                                                                                                             |
| CRP (mg/L; 0-5.0)                                                                     | 9.1                                                                                                                                                       | 14                                                                                   | 91.5                                                              | 149                                                                                    | 8.1                                                                                                                               | 1                                                                                                                                              |
| Fibrinogen (g/L; 1.5-4.0)                                                             | 5.15                                                                                                                                                      | 3.29                                                                                 | 6.5                                                               | NR                                                                                     | 4.08                                                                                                                              | NR                                                                                                                                             |
| D-Dimer (normal range for assay)                                                      | 1800 µg/L (0-550)                                                                                                                                         | 1599 ng/mL (0-230) (day 15, post-IVIG)                                               | 80,000 µg/L (0-550)                                               | 3330 mg/L (250-750)                                                                    | 2033 mg/L (250-750)                                                                                                               | NR                                                                                                                                             |
| Ferritin (µg/L; 30-400)                                                               | 261                                                                                                                                                       | 183                                                                                  | 2661                                                              | 533                                                                                    | 98                                                                                                                                | 287                                                                                                                                            |



|                                                             |                                                                                                                                                                                                                                                                      |                                                                                                                           |                                                                                                                                          |                                                                                                           |                                                                                                          |                                                                                      |
|-------------------------------------------------------------|----------------------------------------------------------------------------------------------------------------------------------------------------------------------------------------------------------------------------------------------------------------------|---------------------------------------------------------------------------------------------------------------------------|------------------------------------------------------------------------------------------------------------------------------------------|-----------------------------------------------------------------------------------------------------------|----------------------------------------------------------------------------------------------------------|--------------------------------------------------------------------------------------|
| Phospholipid antibodies                                     | NR                                                                                                                                                                                                                                                                   | NR                                                                                                                        | NR                                                                                                                                       | NR                                                                                                        | NR                                                                                                       | NR                                                                                   |
| Lupus anticoagulant                                         | NR                                                                                                                                                                                                                                                                   | NR                                                                                                                        | NR                                                                                                                                       | NR                                                                                                        | NR                                                                                                       | NR                                                                                   |
| Other relevant results                                      | ANA positive 1:1280, thyroid peroxidase antibodies positive; paraproteins: 3g IgG lambda, 4g IgG kappa; Significant negatives: neuronal and ganglioside antibodies; antibodies to glycine receptor, GAD, DPPX, NMDA-receptor, LGI1 and CASPR2; ANCA; ENA; complement | Significant negatives: ANA; ANCA; neuronal antibodies; antibodies to LGI1, CASPR2, NMDA receptor GAD, thyroid peroxidase. | ANA positive 1:1280; elevated IgG; Significant negatives: neuronal antibodies, antibodies to NMDA-receptor, LGI1, CASPR2, MOG, AQP4, GAD | ANA and ANCA negative                                                                                     |                                                                                                          | ANA and ANCA negative                                                                |
| <b>CSF</b>                                                  |                                                                                                                                                                                                                                                                      |                                                                                                                           |                                                                                                                                          |                                                                                                           |                                                                                                          |                                                                                      |
| White cell count (cells/ $\mu$ L; 0-5)                      | 1                                                                                                                                                                                                                                                                    | 3                                                                                                                         | 1                                                                                                                                        | 1                                                                                                         | 4                                                                                                        | 0                                                                                    |
| Protein (g/L; 0.13-0.45)                                    | 0.22                                                                                                                                                                                                                                                                 | 1.0                                                                                                                       | 0.38                                                                                                                                     | 0.22                                                                                                      | 2.34                                                                                                     | 1.01                                                                                 |
| Glucose (mmol/L; 2.2-4.2) (blood glucose) (mmol/L; 3.9-5.8) | 3.2 (4.9)                                                                                                                                                                                                                                                            | 3.5                                                                                                                       | 4.01 (5.37)                                                                                                                              | 5.5                                                                                                       | NR                                                                                                       | 3.6 (6.4)                                                                            |
| Other                                                       | Matched oligoclonal bands in serum and CSF; neuronal antibodies negative; antibodies to NMDA receptor and GAD negative; CSF culture and viral PCR negative                                                                                                           | Oligoclonal bands negative; CSF culture and viral PCR negative, including SARS-CoV-2                                      | Oligoclonal bands negative; Antibodies to NMDA receptor negative; CSF culture and viral PCR negative                                     | CSF culture and viral PCR negative including SARS-CoV-2                                                   | Opening pressure 28 cm H20; CSF viral PCR negative including SARS-CoV-2                                  | CSF viral PCR ; negative including SARS-CoV-2                                        |
| <b>Micro/virology</b>                                       | Blood cultures negative                                                                                                                                                                                                                                              | Blood cultures negative                                                                                                   |                                                                                                                                          | Blood and urine cultures negative; screening for other respiratory viruses negative                       |                                                                                                          |                                                                                      |
| <b>Imaging</b>                                              |                                                                                                                                                                                                                                                                      |                                                                                                                           |                                                                                                                                          |                                                                                                           |                                                                                                          |                                                                                      |
| Neuroaxis                                                   | MRI brain normal                                                                                                                                                                                                                                                     | MRI brain - T2 hyperintense signal changes in upper pons, limbic lobes,                                                   | MRI brain - Multiple clusters of lesions in the deep cerebral white matter. Cyst-like areas of varied sizes,                             | MRI brain - Multifocal and confluent areas of signal change in the cerebral hemispheric white matter with | Initial CT head - possible early brainstem swelling, repeat CT day 2 showed hypodensity of brainstem and | MRI brain - Multifocal confluent lesions in internal and external capsules, splenium |

|                                             |                                                                              |                                                                                                                                                                                        |                                                                                                           |                                                                        |                                                                                                                                                                                                                                                                                  |                                                                                                                                                                                                                                                                                          |
|---------------------------------------------|------------------------------------------------------------------------------|----------------------------------------------------------------------------------------------------------------------------------------------------------------------------------------|-----------------------------------------------------------------------------------------------------------|------------------------------------------------------------------------|----------------------------------------------------------------------------------------------------------------------------------------------------------------------------------------------------------------------------------------------------------------------------------|------------------------------------------------------------------------------------------------------------------------------------------------------------------------------------------------------------------------------------------------------------------------------------------|
|                                             |                                                                              | medial thalami and subcortical cerebral white matter. The limbic lobe involvement was symmetrical and included punctate diffusion abnormalities. No micro-haemorrhages or enhancement. | some with haemorrhagic foci and peripheral rims of restricted diffusion were shown within these clusters. | extensive microhaemorrhages in the subcortical regions.                | thalami; MRI brain (day 6)<br>Extensive, confluent and largely symmetrical areas throughout brain stem, limbic and insular lobes, superficial subcortical white matter and deep grey matter. Clusters of microhaemorrhages, restricted diffusion and peripheral rim enhancement. | and deep white matter of cerebral hemispheres. Over 5 days, these lesions increased in size and showed multiple microhaemorrhages and extensive prominent medullary veins. Components of brachial and lumbosacral plexus showed increased signal and enhancement without overt swelling. |
| Chest                                       | CT chest - severe COVID-19 related changes                                   | CT chest suggestive of COVID-19.                                                                                                                                                       | CXR - bilateral, lower zone predominant, ill-defined airspace opacification, consistent with COVID-19     | CXR - bilateral subpleural airspace infiltrates suggestive of COVID-19 | CXR - bibasal atelectasis but no consolidation. Mild pulmonary venous congestion + mild bilateral pleural effusions                                                                                                                                                              | CT chest - bilateral infiltrates                                                                                                                                                                                                                                                         |
| Other imaging                               | FDG PET CT – no malignancy                                                   |                                                                                                                                                                                        |                                                                                                           |                                                                        |                                                                                                                                                                                                                                                                                  |                                                                                                                                                                                                                                                                                          |
| <b>Other investigations</b>                 |                                                                              |                                                                                                                                                                                        |                                                                                                           |                                                                        |                                                                                                                                                                                                                                                                                  |                                                                                                                                                                                                                                                                                          |
| Neurophysiology                             | EEG normal, no correlate for movements                                       |                                                                                                                                                                                        | EEG - non-specific cortical dysfunction, mild diffuse encephalopathy                                      |                                                                        |                                                                                                                                                                                                                                                                                  | NCS - moderately severe acute demyelinating polyradiculoneuropathy; EEG - encephalopathy, no epileptiform discharges                                                                                                                                                                     |
| <b>Treatment</b>                            |                                                                              |                                                                                                                                                                                        |                                                                                                           |                                                                        |                                                                                                                                                                                                                                                                                  |                                                                                                                                                                                                                                                                                          |
| For neurological diagnosis                  | 1g IVMP 3 days, then oral prednisolone taper; levetiracetam; clonazepam      | 1g IVMP 3 days then oral prednisolone taper, IVIG                                                                                                                                      | Supportive                                                                                                | 1g IVMP 3 days                                                         | Intubation and ventilation; levetiracetam, aciclovir and ceftriaxone, dexamethasone                                                                                                                                                                                              | Intubation and ventilation; 1g IVMP 5 days; IVIG                                                                                                                                                                                                                                         |
| For COVID-19 infection                      | Oxygen                                                                       | None required                                                                                                                                                                          | Intubation and ventilation; renal replacement                                                             | Intubation and ventilation                                             | Intubation for low conscious level rather than respiratory reasons                                                                                                                                                                                                               | Oxygen; intubation and ventilation for type 2 respiratory failure                                                                                                                                                                                                                        |
| Other                                       |                                                                              |                                                                                                                                                                                        |                                                                                                           |                                                                        | Platelet infusions for thrombocytopenia                                                                                                                                                                                                                                          |                                                                                                                                                                                                                                                                                          |
| <b>Outcomes</b>                             |                                                                              |                                                                                                                                                                                        |                                                                                                           |                                                                        |                                                                                                                                                                                                                                                                                  |                                                                                                                                                                                                                                                                                          |
| Total duration of hospital admission (days) | 22                                                                           | 28                                                                                                                                                                                     | Ongoing                                                                                                   | Ongoing                                                                | 10                                                                                                                                                                                                                                                                               | Ongoing                                                                                                                                                                                                                                                                                  |
| Outcome at last follow up                   | Incomplete recovery; slow improvement but ongoing myoclonus; discharged home | Incomplete recovery; ongoing cognitive impairment; discharged home                                                                                                                     | Incomplete recovery; improving                                                                            | Incomplete recovery; improving                                         | No response to treatment; died                                                                                                                                                                                                                                                   | Incomplete recovery; improving; ongoing rehabilitation                                                                                                                                                                                                                                   |

**Table S1b: Twelve patients with inflammatory CNS syndromes (encephalitis, para- and post- infectious) (part 2 of 2)**

| Patient                                                                   | 17                                      | 18                                        | 19                                | 20                                     | 21                               | 22                                                  |
|---------------------------------------------------------------------------|-----------------------------------------|-------------------------------------------|-----------------------------------|----------------------------------------|----------------------------------|-----------------------------------------------------|
| Age (years)                                                               | 47                                      | 54                                        | 60                                | 33                                     | 27                               | 48                                                  |
| Gender (M/F)                                                              | F                                       | F                                         | F                                 | F                                      | F                                | M                                                   |
| Ethnicity                                                                 | Other                                   | Mixed                                     | Black                             | White                                  | Asian                            | White                                               |
| Final neurological diagnosis                                              | ADEM (with haemorrhage)                 | ADEM                                      | ADEM                              | ADEM with myelitis                     | ADEM with myelitis               | Post-infectious myelitis                            |
| Past medical history                                                      | asthma                                  | Hypertension; polycystic ovarian syndrome | Hypertension; diabetes            | None                                   | None                             | Hypertension; diabetes                              |
| Initial COVID-19 symptoms                                                 | Cough; fever; dyspnoea                  | Cough; fever; dysgeusia; truncal rash     | Cough; dyspnoea; diarrhoea; fever | Fever                                  | Cough; fever; anosmia; dysgeusia | Cough; dyspnoea; fever                              |
| <b>Days from onset of COVID-19 symptoms to:</b>                           |                                         |                                           |                                   |                                        |                                  |                                                     |
| 1) Hospital admission                                                     | 8                                       | 23                                        | 4                                 | 4                                      | 21                               | 1st: day 3; 2nd: day 7; 3rd: day 21                 |
| 2) Onset of neurological symptoms                                         | 8                                       | 14                                        | 18                                | 2                                      | 8                                | 19                                                  |
| 3) ICU admission                                                          | 11 (for deterioration in consciousness) | N/A                                       | 4                                 | 4 (for deterioration in consciousness) | N/A                              | N/A                                                 |
| Main reason for hospital admission (neurological vs respiratory symptoms) | Neurological                            | Neurological                              | Respiratory                       | Neurological                           | Neurological                     | 1st Respiratory ; 2nd Respiratory; 3rd Neurological |
| Security of COVID-19 diagnosis                                            | Probable                                | Probable                                  | Definite                          | Possible                               | Probable                         | Definite                                            |
| Severity of COVID-19 infection                                            | Severe                                  | Mild                                      | Critical                          | Mild                                   | Mild                             | Mild                                                |
| Duration of ICU stay (days)                                               | 8                                       | N/A                                       | 24                                | 34                                     | N/A                              | N/A                                                 |

|                                                                                       |                                                                                        |                                                                                                                                                             |                             |                                                                                 |                                                                                                                                            |                                                                                                                                                  |
|---------------------------------------------------------------------------------------|----------------------------------------------------------------------------------------|-------------------------------------------------------------------------------------------------------------------------------------------------------------|-----------------------------|---------------------------------------------------------------------------------|--------------------------------------------------------------------------------------------------------------------------------------------|--------------------------------------------------------------------------------------------------------------------------------------------------|
| <b>Initial neurological symptoms</b>                                                  | Subacute left sided numbness and weakness; headache; vomiting; reduced conscious level | Unsteadiness; left sided limb weakness; slurred speech; fatigue; falls                                                                                      | Slow to wake in ICU         | Headache; confusion; reduced conscious level                                    | Sensory symptoms in feet and right hand; difficulty with balance and walking                                                               | Numbness of hands and feet; band of itching sensation at level of the umbilicus; unsteady gait                                                   |
| <b>Key neurological signs</b>                                                         | Dense left hemiparesis; reduced sensation on left                                      | Drowsy; slow to respond; dysarthric; trunk and limb ataxia; broad base standing; unable to walk; left-sided pyramidal weakness; bilateral extensor plantars | Extensor posturing of limbs | Low conscious level; brainstem breathing pattern; at worst locked-in; areflexic | Spastic gait, broad based; increased tone with ankle clonus; pyramidal weakness; loss of pinprick and fine touch in feet; no sensory level | Weakness of hip flexion; brisk reflexes; extensor plantars; vibration impaired to costal margins, JPS to ankles, pinprick to T10; sensory ataxia |
| <b>Initial laboratory results at or nearest to time of neurological symptom onset</b> |                                                                                        |                                                                                                                                                             |                             |                                                                                 |                                                                                                                                            |                                                                                                                                                  |
| Hb (g/L; 130-170)                                                                     | 130                                                                                    | 139                                                                                                                                                         | 68                          | 112                                                                             | 130                                                                                                                                        | 157                                                                                                                                              |
| MCV (fL; 80-99)                                                                       | 84.2                                                                                   | 75.1                                                                                                                                                        | 93.1                        | 93.7                                                                            | 82.4                                                                                                                                       | 89.2                                                                                                                                             |
| Lymphs (x10 <sup>9</sup> /L; 1.2-3.65)                                                | 0.92                                                                                   | 2.3                                                                                                                                                         | 1.74                        | 1.79                                                                            | 1.81                                                                                                                                       | 2                                                                                                                                                |
| Neuts (x10 <sup>9</sup> /L; 2-7.5)                                                    | 7.26                                                                                   | 6.2                                                                                                                                                         | 10.12                       | 8.52                                                                            | 2.35                                                                                                                                       | 3.37                                                                                                                                             |
| Plt (x10 <sup>9</sup> /L; 150-400)                                                    | 271                                                                                    | 345                                                                                                                                                         | 336                         | 174                                                                             | 249                                                                                                                                        | 278                                                                                                                                              |
| ESR (mm/hr; 1-20)                                                                     | 58                                                                                     | NR                                                                                                                                                          | 88                          | 43                                                                              | 12                                                                                                                                         | NR                                                                                                                                               |
| CRP (mg/L; 0-5.0)                                                                     | 34                                                                                     | 18.5                                                                                                                                                        | 169.8                       | 7.6                                                                             | 1.2                                                                                                                                        | <5                                                                                                                                               |
| Fibrinogen (g/L; 1.5-4.0)                                                             | NR                                                                                     | 5.7                                                                                                                                                         | NR                          | 6.92                                                                            | NR                                                                                                                                         | 3.25                                                                                                                                             |
| D-Dimer (normal range for assay)                                                      | 1160 µg/L (0-550)                                                                      | NR                                                                                                                                                          | >8000 ng/mL (<500)          | 2210 µg/L (0-550)                                                               | NR                                                                                                                                         | NR                                                                                                                                               |
| Ferritin (µg/L; 30-400)                                                               | 92                                                                                     | NR                                                                                                                                                          | 521                         | 998                                                                             | NR                                                                                                                                         | 473                                                                                                                                              |
| Phospholipid antibodies                                                               | NR                                                                                     | Negative                                                                                                                                                    | NR                          | Negative                                                                        | NR                                                                                                                                         | NR                                                                                                                                               |
| Lupus anticoagulant                                                                   | NR                                                                                     | Positive                                                                                                                                                    | Negative                    | Positive                                                                        | NR                                                                                                                                         | NR                                                                                                                                               |

|                                                             |                                                                                                                                                                                                                                          |                                                                                                                     |                                                                                                |                                                                                                                                                                                                                                                                                                                                                                                                 |                                                                                                                                                                                                                                                                                            |                                                                                                                                                                                                                                                         |
|-------------------------------------------------------------|------------------------------------------------------------------------------------------------------------------------------------------------------------------------------------------------------------------------------------------|---------------------------------------------------------------------------------------------------------------------|------------------------------------------------------------------------------------------------|-------------------------------------------------------------------------------------------------------------------------------------------------------------------------------------------------------------------------------------------------------------------------------------------------------------------------------------------------------------------------------------------------|--------------------------------------------------------------------------------------------------------------------------------------------------------------------------------------------------------------------------------------------------------------------------------------------|---------------------------------------------------------------------------------------------------------------------------------------------------------------------------------------------------------------------------------------------------------|
| Other relevant results                                      | Significant negatives: neuronal antibodies; antibodies to AQP4 and MOG                                                                                                                                                                   |                                                                                                                     | ANA and ANCA negative                                                                          | Significant negatives: ANA, ENA, ANCA; antibodies to AQP4, MOG                                                                                                                                                                                                                                                                                                                                  | ANA and ANCA negative                                                                                                                                                                                                                                                                      |                                                                                                                                                                                                                                                         |
| <b>CSF:</b>                                                 |                                                                                                                                                                                                                                          |                                                                                                                     |                                                                                                |                                                                                                                                                                                                                                                                                                                                                                                                 |                                                                                                                                                                                                                                                                                            |                                                                                                                                                                                                                                                         |
| White cell count (cells/ $\mu$ L; 0-5)                      | Not done (mass effect on imaging).                                                                                                                                                                                                       | 19 (10% polymorphs, 90% lymphocytes),                                                                               | <5                                                                                             | 54 (95% polymorphs)                                                                                                                                                                                                                                                                                                                                                                             | 4                                                                                                                                                                                                                                                                                          | 10 (lymphocytes),                                                                                                                                                                                                                                       |
| Protein (g/L; 0.13-0.45)                                    | .                                                                                                                                                                                                                                        | 0.33                                                                                                                | 0.36                                                                                           | 0.31                                                                                                                                                                                                                                                                                                                                                                                            | 0.52                                                                                                                                                                                                                                                                                       | 0.7                                                                                                                                                                                                                                                     |
| Glucose (mmol/L; 2.2-4.2) (blood glucose) (mmol/L; 3.9-5.8) | .                                                                                                                                                                                                                                        | 4.1 (5.5)                                                                                                           | 8.4 (12.5)                                                                                     | 7.2 (13.5)                                                                                                                                                                                                                                                                                                                                                                                      | 3.1 (4.6)                                                                                                                                                                                                                                                                                  | 5.6                                                                                                                                                                                                                                                     |
| Other                                                       |                                                                                                                                                                                                                                          | Oligoclonal bands negative; CSF culture - scanty growth of Staphylococcus capitis - likely contaminant              | Oligoclonal bands negative; CSF viral PCR including SARS-CoV-2 negative                        | Oligoclonal bands negative; antibodies to MOG, AQP4, NMDA receptor, CASPR2 and LGI1 all negative; CSF culture and viral PCR negative including SARS-CoV-2                                                                                                                                                                                                                                       | CSF culture negative; antibodies to AQP4 and MOG pending at time of publication                                                                                                                                                                                                            | Matched oligoclonal bands in serum and CSF; CSF culture and viral PCR negative                                                                                                                                                                          |
| <b>Micro/virology</b>                                       | Blood and urine cultures negative; screen for other respiratory viruses negative; Brain biopsy - viral PCR negative including SARS-CoV-2; mycoplasma PCR negative.                                                                       |                                                                                                                     | Blood, urine, sputum cultures negative; HTLV1 negative                                         | Tic-borne encephalitis virus, Lyme, returning traveller screen (Porton Down) all negative                                                                                                                                                                                                                                                                                                       | HTLV1 serology negative                                                                                                                                                                                                                                                                    | Blood and urine cultures negative, HTLV 1/2 negative, syphilis negative                                                                                                                                                                                 |
| <b>Imaging</b>                                              |                                                                                                                                                                                                                                          |                                                                                                                     |                                                                                                |                                                                                                                                                                                                                                                                                                                                                                                                 |                                                                                                                                                                                                                                                                                            |                                                                                                                                                                                                                                                         |
| MRI neuroaxis                                               | Severe right hemispheric vasogenic oedema with a leading edge on contrast imaging. Smaller areas of T2 hyperintense changes in the left hemisphere. Marked mass-effect with 10mm leftwards midline shift, and mild subfalcine herniation | Multiple large lesions with peripheral rim restriction in periventricular white matter of both cerebral hemispheres | Multifocal lesions with diffusion changes in periventricular white matter and corpus callosum. | Initial MR showed multifocal lesions in lower brainstem, medial temporal lobes and cerebral white matter, some of which showed restricted diffusion. 3 days later, the brainstem lesions coalesced and extensive intramedullary lesions with swelling involving grey and white matter of the spinal cord appeared. At 3 week follow-up, these lesions persisted but without swelling or oedema. | Diffuse ill-defined confluent T2 hyperintensity involving the white matter of the cerebral hemispheres, largely along the corticospinal tracts. Small focal area of diffusion change in the left motor cortex. Ill-defined intramedullary lesion without swelling in the conus medullaris. | <b>MRI brain normal;</b> MRI thoracic spine - a patchy area of intramedullary high signal in the dorsal cord primarily at T5-6 and T10-11 and down to the conus with no enhancement with contrast. Felt to be consistent with post-infectious myelitis. |
| Chest                                                       | CTPA – changes at lung bases that could be compatible with COVID-19 infection                                                                                                                                                            | CXR - normal                                                                                                        | CT chest - bilateral pulmonary infiltrates                                                     | CT chest - not typical for COVID-19                                                                                                                                                                                                                                                                                                                                                             | NR                                                                                                                                                                                                                                                                                         | CXR - patchy infiltrates; Further CXR - pneumonia                                                                                                                                                                                                       |

| <b>Other relevant investigations</b>        |                                                                                                          |                                        |                                               |                                                                                                   |                            |                                                        |
|---------------------------------------------|----------------------------------------------------------------------------------------------------------|----------------------------------------|-----------------------------------------------|---------------------------------------------------------------------------------------------------|----------------------------|--------------------------------------------------------|
| Neurophysiology                             |                                                                                                          |                                        | EEG – diffuse encephalopathy                  | EEG - diffuse encephalopathy                                                                      |                            | Normal nerve conduction studies and EMG                |
| Histology                                   | Brain biopsy - histology consistent with ADEM                                                            |                                        |                                               |                                                                                                   |                            |                                                        |
| <b>Treatment given</b>                      |                                                                                                          |                                        |                                               |                                                                                                   |                            |                                                        |
| For neurological diagnosis                  | Intubation for low conscious level; right hemispherectomy; 1g IVMP 5 days, then oral prednisolone; IVIG. | 1g IVMP 3 days, then oral prednisolone | 1g IVMP 3 days, then oral prednisolone taper  | Intubation for low conscious level; ICP bolt; lumbar drain; 1g IVMP 3 days then oral prednisolone | None                       | 1g IVMP 3 days                                         |
| For COVID-19 infection                      | Oxygen                                                                                                   | None required                          | Intubation and ventilation; renal replacement | None required                                                                                     | None required              | None required                                          |
| Other                                       |                                                                                                          |                                        |                                               |                                                                                                   |                            | Antibiotics for secondary bacterial pneumonia          |
| <b>Outcomes</b>                             |                                                                                                          |                                        |                                               |                                                                                                   |                            |                                                        |
| Total duration of hospital admission (days) | Ongoing                                                                                                  | Ongoing                                | Ongoing                                       | Ongoing                                                                                           | 0 (Outpatient management)  | 1st and 2nd: 1 day each; 3rd: 9 days                   |
| Outcome at last follow up                   | Incomplete recovery; improving                                                                           | Incomplete recovery; improving         | Incomplete recovery; improving                | Incomplete recovery; improving                                                                    | Complete recovery; at home | Incomplete recovery; improving; ongoing rehabilitation |

**Table S1c. Demographic, clinical, radiological, laboratory and characteristics of eight individuals with possible and definite COVID-19 infection with ischaemic stroke**

| Patient                                         | 23                                                                                            | 24                                            | 25                                                                                                | 26                                                                                                                                                    | 27                                                        | 28                                                                                                                                   | 29                                                                                                         | 30                                                                                                        |
|-------------------------------------------------|-----------------------------------------------------------------------------------------------|-----------------------------------------------|---------------------------------------------------------------------------------------------------|-------------------------------------------------------------------------------------------------------------------------------------------------------|-----------------------------------------------------------|--------------------------------------------------------------------------------------------------------------------------------------|------------------------------------------------------------------------------------------------------------|-----------------------------------------------------------------------------------------------------------|
| Age at presentation (years)                     | 61                                                                                            | 64                                            | 64                                                                                                | 53                                                                                                                                                    | 58                                                        | 85                                                                                                                                   | 73                                                                                                         | 27                                                                                                        |
| Gender (M/F)                                    | M                                                                                             | M                                             | M                                                                                                 | F                                                                                                                                                     | M                                                         | M                                                                                                                                    | M                                                                                                          | F                                                                                                         |
| Ethnicity                                       | Black                                                                                         | White                                         | White                                                                                             | Asian                                                                                                                                                 | Black                                                     | White                                                                                                                                | Asian                                                                                                      | White                                                                                                     |
| Stroke type, observed/implicated mechanism      | Ischaemic right middle cerebral artery occlusion                                              | Ischaemic, vertebral-basilar artery occlusion | Ischaemic bilateral ACA-MCA and MCA-PCA cortical and deep borderzone infarct                      | Ischaemic, vertebral-basilar artery occlusion                                                                                                         | Ischaemic, proximal left middle cerebral artery occlusion | Ischaemic, Left posterior cerebral artery occlusion                                                                                  | Ischaemic basilar artery occlusion                                                                         | Ischaemic left internal cerebral artery occlusion                                                         |
| Medical history and risk factors for stroke     | Hypertension; stroke 8 years ago (left-sided weakness); cellulitis; increased body mass index | Nil                                           | Recurrent DVTs (rivaroxaban), Conn Syndrome                                                       | Mitral valve replacement (metal valve), atrial fibrillation (on warfarin), heart failure, PPM in situ, hypertension, type 2 diabetes, Grave's disease | Spondylosis                                               | Hypertension, hypercholesterolaemia, atrial fibrillation (on apixaban), ischaemic heart disease, prostate cancer (Gleason Score 4+5) | Gastric carcinoma (resected), benign essential tremor                                                      | Nil                                                                                                       |
| <b>Days from onset of COVID-19 symptoms to:</b> |                                                                                               |                                               |                                                                                                   |                                                                                                                                                       |                                                           |                                                                                                                                      |                                                                                                            |                                                                                                           |
| 1) Hospital admission                           | -2                                                                                            | 10                                            | 7                                                                                                 | 21                                                                                                                                                    | 2                                                         | 10                                                                                                                                   | 8                                                                                                          | 0                                                                                                         |
| 2) Onset of neurological symptoms               | -2                                                                                            | 15                                            | .                                                                                                 | 22                                                                                                                                                    | 2                                                         | 10                                                                                                                                   | 8                                                                                                          | 0                                                                                                         |
| 3) ICU admission; duration (days)               | Did not go to ICU                                                                             | Yes - 5                                       | Yes - 13                                                                                          | Yes -8                                                                                                                                                | Did not go to ICU                                         | Did not go to ICU                                                                                                                    | Did not go to ICU                                                                                          | Yes - 7                                                                                                   |
| Main reason for hospital admission              | Neurological                                                                                  | Respiratory                                   | Respiratory                                                                                       | Respiratory                                                                                                                                           | Neurological                                              | Neurological                                                                                                                         | Neurological                                                                                               | Neurological                                                                                              |
| Security of COVID-19 diagnosis                  | Definite                                                                                      | Definite                                      | Definite                                                                                          | Definite                                                                                                                                              | Probable                                                  | Definite                                                                                                                             | Definite                                                                                                   | Probable                                                                                                  |
| Chest radiograph changes                        | CT chest: Bilateral patchy subpleural airspace opacification in both lungs                    | CXR: Bilateral pulmonary infiltrates          | CXR: Bilateral parenchymal airspace infiltrates, more confluent within the lower zones. Bilateral | CXR: Bilateral ground-glass changes and consolidation                                                                                                 | CXR: normal CT chest: Lungs clear                         | peripheral airspace opacities throughout both lungs, worse on right CXR: Bilateral                                                   | CXR: Bilateral predominantly peripheral airspace opacities, most confluent at the mid-zones and lung bases | CXR: CT chest: patchy ground glass infiltrates of the left upper lobe. Other indeterminate infiltrates at |

|                                                                         |                                                                                                                                 |                                                                                                                                                                                                                                                                                   |                                                                                                                                                                                                                                                                |                                                                                                                                                           |                                                                                                                                                                           |                                                                                                                                                                          |                                                                                                                                                                                                            |                                                                                                                                                                                                   |
|-------------------------------------------------------------------------|---------------------------------------------------------------------------------------------------------------------------------|-----------------------------------------------------------------------------------------------------------------------------------------------------------------------------------------------------------------------------------------------------------------------------------|----------------------------------------------------------------------------------------------------------------------------------------------------------------------------------------------------------------------------------------------------------------|-----------------------------------------------------------------------------------------------------------------------------------------------------------|---------------------------------------------------------------------------------------------------------------------------------------------------------------------------|--------------------------------------------------------------------------------------------------------------------------------------------------------------------------|------------------------------------------------------------------------------------------------------------------------------------------------------------------------------------------------------------|---------------------------------------------------------------------------------------------------------------------------------------------------------------------------------------------------|
|                                                                         |                                                                                                                                 |                                                                                                                                                                                                                                                                                   | shallow pleural effusions                                                                                                                                                                                                                                      |                                                                                                                                                           |                                                                                                                                                                           |                                                                                                                                                                          |                                                                                                                                                                                                            | the level of both lung bases.                                                                                                                                                                     |
| <b>Severity of COVID-19 infection</b>                                   | Mild                                                                                                                            | Critical                                                                                                                                                                                                                                                                          | Critical                                                                                                                                                                                                                                                       | Critical                                                                                                                                                  | Mild                                                                                                                                                                      | Mild                                                                                                                                                                     | Mild                                                                                                                                                                                                       | Mild                                                                                                                                                                                              |
| <b>Premorbid mRS</b>                                                    | 2                                                                                                                               | 0                                                                                                                                                                                                                                                                                 | 0                                                                                                                                                                                                                                                              | 1                                                                                                                                                         | 0                                                                                                                                                                         | 0                                                                                                                                                                        | 0                                                                                                                                                                                                          | 0                                                                                                                                                                                                 |
| <b>Signs and symptoms of stroke</b>                                     | Dysarthria, left facial droop and left-sided weakness                                                                           | 1st event – left ataxic monoparesis of upper limb; 2nd event 7 days after (despite anticoagulation) - bilateral incoordination and right homonymous hemianopia                                                                                                                    | Incidental (ICU)                                                                                                                                                                                                                                               | Acute confusion, incoordination, reduced consciousness (GCS 13/15)                                                                                        | Aphasia and right-sided hemiparesis                                                                                                                                       | Dysarthria, right facial droop                                                                                                                                           | Aphasia, right facial droop and right-sided weakness                                                                                                                                                       | Dysphasia and left-sided hemiparesis                                                                                                                                                              |
| <b>Baseline NIHSS</b>                                                   | 5                                                                                                                               | 2                                                                                                                                                                                                                                                                                 | .                                                                                                                                                                                                                                                              | .                                                                                                                                                         | 23                                                                                                                                                                        | 6                                                                                                                                                                        | 15                                                                                                                                                                                                         | 15                                                                                                                                                                                                |
| <b>Imaging used for diagnosis</b>                                       | CT, CTA, MRI                                                                                                                    | CT, CTA, MRI                                                                                                                                                                                                                                                                      | CT, CTA, MRI                                                                                                                                                                                                                                                   | CT, CTA                                                                                                                                                   | CT, CTA, MRI                                                                                                                                                              | CT, CTA                                                                                                                                                                  | CT, CTA, MRI                                                                                                                                                                                               | CT, CTA                                                                                                                                                                                           |
| <b>Risk factors for cardioembolism †</b>                                | No                                                                                                                              | No                                                                                                                                                                                                                                                                                | Yes - AF                                                                                                                                                                                                                                                       | Yes - AF                                                                                                                                                  | No                                                                                                                                                                        | Yes - AF                                                                                                                                                                 | No                                                                                                                                                                                                         | No                                                                                                                                                                                                |
| <b>Significant carotid stenosis *</b>                                   | No                                                                                                                              | No                                                                                                                                                                                                                                                                                | No                                                                                                                                                                                                                                                             | No                                                                                                                                                        | No                                                                                                                                                                        | No                                                                                                                                                                       | No                                                                                                                                                                                                         | No                                                                                                                                                                                                |
| <b>Venous thromboembolism</b>                                           | Yes - PE                                                                                                                        | Yes - PE                                                                                                                                                                                                                                                                          | No                                                                                                                                                                                                                                                             | No                                                                                                                                                        | Yes - PE                                                                                                                                                                  | No                                                                                                                                                                       | No                                                                                                                                                                                                         | Yes -PE                                                                                                                                                                                           |
| <b>Brain imaging</b>                                                    | MRI - Acute infarct in the right corpus striatum. Multiple supra- and infra-tentorial cortical and subcortical microhemorrhages | MRI (1st event): acute and acute left posterior-inferior cerebellar artery territory infarction with microhaemorrhages. 2nd event - 7 days later: bilateral acute posterior cerebral artery territory infarcts despite therapeutic anticoagulation left vertebral artery thrombus | MRI: subacute infarcts within the deep internal borderzones of the cerebral hemispheres bilaterally, and within the left frontal white matter. Background moderate small vessel disease and established cortical infarcts, in arterial borderzone territories. | Non-contrast CT showed acute right parietal cortical and left cerebellar infarct with mass effect and hydrocephalus, despite therapeutic anticoagulation. | MRI: Extensive evolving left MCA infarct with evidence of petechial haemorrhage and associated mass-effect as described. Persistent occlusion of the left M2 MCA branches | Non-contrast CT: showed hyperdensity consistent with thrombus in the left posterior cerebral artery and acute infarction in the left temporal stem and cerebral peduncle | MRI: acute infarction in the right thalamus, left pons, right occipital lobe and right cerebellar hemisphere. Thrombotic material in the basilar artery and bilateral mild-to-moderate P2 segment stenosis | CT: Extensive acute right middle cerebral artery and right anterior cerebral artery territory infarction. There is local swelling and sulcal effacement with new leftward midline shift of ~4 mm. |
| <b>Laboratory results within 24 hours of neurological symptom onset</b> |                                                                                                                                 |                                                                                                                                                                                                                                                                                   |                                                                                                                                                                                                                                                                |                                                                                                                                                           |                                                                                                                                                                           |                                                                                                                                                                          |                                                                                                                                                                                                            |                                                                                                                                                                                                   |



|                                             |          |                         |                 |          |          |          |                 |          |
|---------------------------------------------|----------|-------------------------|-----------------|----------|----------|----------|-----------------|----------|
| <b>Hb (g/L; 130-170)</b>                    | 126      | 117                     | 70              | 106      | 147      | 128      | 159             | 81       |
| <b>MCV (fL; 80-99)</b>                      | 94.2     | 90                      | 100.4           | 89.1     | 93.4     | 85       | 88              | 93.5     |
| <b>Lymphs (x10<sup>9</sup>/L; 1.2-3.65)</b> | 1.31     | 0.53                    | 1.79            | 2.07     | 1.49     | 1.09     | 1.65            | 2.16     |
| <b>Neuts (x10<sup>9</sup>/L; 2-7.5)</b>     | 6.39     | 6.65                    | 23.82           | 18.2     | 8.87     | 5.87     | 6.68            | 8.96     |
| <b>Plt (x10<sup>9</sup>/L; 150-400)</b>     | 408      | 303                     | 294             | 328      | 128      | 287      | 632             | 403      |
| <b>CRP (mg/L; 0-5.0)</b>                    | 12.8     | 280                     | 326.2           | 97.4     | 45       | 161      | 179.9           | 119      |
| <b>Fibrinogen (g/L; 1.5-4.0)</b>            | 4.63     | 9.5                     | 8.82            | 2.91     | 3.15     | 5.3      | NR              | NR       |
| <b>D-Dimer (µg/L; 0-550)</b>                | 27190    | 80000                   | 29000           | 7750     | 75320    | 16100    | NR              | NR       |
| <b>Prothrombin time (secs; 10-12)</b>       | 10.7     | 11.6                    | 12.6            | 34.4     | 12.2     | 11.3     | 14.9            | 11.5     |
| <b>APTT (secs; 25-37)</b>                   | 29       | 35                      | 34              | 64.7     | 23       | 33       | 30              | 26       |
| <b>Cardiolipin antibody</b>                 | Negative | IgM (Medium titre)      | IgG (low titre) | Negative | Negative | Negative | Negative        | Negative |
| <b>Lupus anticoagulant</b>                  | Positive | Positive                | NR              | Positive | Positive | Negative | Negative        | Positive |
| <b>Beta-2 glycoprotein</b>                  | Negative | IgM and IgG (low titre) | NR              | Negative | Negative | Negative | IgM (low titre) | Negative |
| <b>Ferritin (µg/L; 30-400)</b>              | 1167     | 3563                    | 1044            | 828      | NR       | NR       | NR              | NR       |
| <b>Total cholesterol (mmol/L; 2.5-5.0)</b>  | 4.1      | 2.6                     | NR              | 2.2      | 5        | 2.9      | 4.1             | 6.2      |
| <b>LDL (mmol/L; 0-3.5)</b>                  | 2.4      | 1.4                     | NR              | 0.8      | 3.4      | 1.1      | 2.2             | 3.4      |
| <b>HDL (mmol/L; 0.9-1.5)</b>                | 1        | 0.5                     | NR              | 0.9      | 0.9      | 0.9      | 0.8             | 1.1      |
| <b>Triglyceride (mmol/L; 0.4-2.3)</b>       | 1.5      | 1.5                     | NR              | 1        | 1.6      | 1.9      | 2.4             | 3.8      |

|                                     |                     |                     |                                |      |                     |                                              |                                         |                           |
|-------------------------------------|---------------------|---------------------|--------------------------------|------|---------------------|----------------------------------------------|-----------------------------------------|---------------------------|
| <b>Glucose (mmol/L; 3.9-5.8)</b>    | 6.2                 | 6.9                 | NR                             | 6.8  | 6.5                 | 9.4                                          | NR                                      | NR                        |
| <b>Management:</b>                  |                     |                     |                                |      |                     |                                              |                                         |                           |
| <b>Tissue Plasminogen activator</b> | No                  | No                  | No                             | No   | No                  | No                                           | Yes                                     | No                        |
| <b>Mechanical Thrombectomy</b>      | No                  | No                  | No                             | No   | No                  | No                                           | No                                      | No                        |
| <b>Antithrombotic therapy</b>       | LMWH                | LMWH                | LMWH                           | LMWH | LMWH                | aspirin seven days then switched to apixaban | aspirin five days then switched to LMWH | Aspirin 10 days then LMWH |
| <b>Outcome Status</b>               | Rehabilitation unit | Rehabilitation unit | Remains static in ICU (day 31) | Died | Rehabilitation unit | Rehabilitation unit                          | Stroke Unit                             | Rehabilitation unit       |

Footnote: ¥ Atrial fibrillation/flutter, Severe LVEF, reduced myocardial wall motion activity, left ventricular mural thrombus - sourced from electrocardiogram, cardiac echocardiogram, and 72 hour holter monitor  
\*significant defined by >50% narrowing. LMWH: low molecular weight heparin; mRS: modified Rankin Scale; NHISS: National Institute for Health Stroke Scale; DVT: Deep Vein Thrombosis; PPM: Permanent Pacemaker; AF: Atrial Fibrillation, MCA; Middle Cerebral Artery; ACA: Anterior Cerebral Artery; PCA: Posterior Cerebral Artery.

**Table S1d. Demographic, clinical, radiological, laboratory and characteristics of individuals with possible and definite COVID-19 infection with peripheral neurological syndromes**

| Patient                                                          | 31                                                          | 32                       | 33                               | 34                                        | 35                         | 36                    | 37               | 38                         |
|------------------------------------------------------------------|-------------------------------------------------------------|--------------------------|----------------------------------|-------------------------------------------|----------------------------|-----------------------|------------------|----------------------------|
| Age at presentation (years)                                      | 61                                                          | 57                       | 63                               | 42                                        | 60                         | 20                    | 38               | 60                         |
| Gender (M/F)                                                     | M                                                           | M                        | M                                | M                                         | M                          | M                     | M                | M                          |
| Ethnicity                                                        | White                                                       | White                    | Other                            | White                                     | White                      | Black                 | White            | White                      |
| Final neurological diagnosis                                     | GBS                                                         | GBS                      | GBS                              | GBS                                       | GBS                        | GBS                   | GBS              | Brachial plexopathy        |
| Past medical history                                             | Cluster headache, cervical myelopathy, diabetes, arrhythmia | Hypercholesterolaemia    | Depression                       | Nil                                       | Nil                        | Nil                   | Nil              | Myeloma; cerebellar stroke |
| Initial COVID-19 symptoms                                        | Cough; fever; malaise; headache                             | Fever; headache; myalgia | Cough; myalgia; dyspnoea; fevers | Cough, fever dyspnoea, diarrhoea, anosmia | Headache; ageusia; anosmia | Cough, fever, ageusia | Cough, diarrhoea | Cough                      |
| <b>Days from onset of COVID-19 symptoms to:</b>                  |                                                             |                          |                                  |                                           |                            |                       |                  |                            |
| 1) Hospital admission                                            | 15                                                          | 11                       | 31                               | 14                                        | 0                          | 14                    | 23               | 17                         |
| 2) Onset of neurological symptoms                                | 14                                                          | 6                        | 18                               | 13                                        | -1                         | 10                    | 21               | 14                         |
| 3) ICU admission                                                 | 17                                                          | N/A                      | N/A                              | 16                                        | 5                          | N/A                   | N/A              | N/A                        |
| Main reason for admission (neurological vs respiratory symptoms) | Neurological                                                | Neurological             | Neurological                     | Neurological                              | Neurological               | Neurological          | Neurological     | Neurological               |
| Security of COVID-19 diagnosis (definite, probable, possible)    | Possible                                                    | Possible                 | Possible                         | Definite                                  | Definite                   | Possible              | Definite         | Definite                   |
| Severity of COVID-19 infection                                   | Mild                                                        | Mild                     | Mild                             | Mild                                      | Critical                   | Mild                  | Mild             | Mild                       |
| Duration of ICU stay                                             | 11                                                          | NA                       | NA                               | 17 days                                   | 41 days (ongoing)          | NA                    | NA               | NA                         |

| <b>Initial neurological symptoms</b>                                                  | Distal limb numbness     | Distal limb weakness and numbness                                              | Distal paraesthesia; limb weakness; facial weakness                | Distal limb numbness and weakness; dysphagia | Distal limb numbness and weakness                                                | Distal limb numbness and weakness  | Distal limb numbness, weakness, clumsiness | Unilateral painless arm weakness and numbness            |
|---------------------------------------------------------------------------------------|--------------------------|--------------------------------------------------------------------------------|--------------------------------------------------------------------|----------------------------------------------|----------------------------------------------------------------------------------|------------------------------------|--------------------------------------------|----------------------------------------------------------|
| <b>Key neurological signs</b>                                                         | Quadriparesis; areflexia | Bilateral facial nerve palsy; bulbar weakness; distal limb weakness; areflexia | Right facial nerve palsy; quadriparesis; areflexia; sensory ataxia | Quadriparesis; areflexia; sensory loss       | Quadriparesis; areflexia; sensory loss; dysautonomia; facial and bulbar weakness | Mild distal weakness and areflexia | Mild distal weakness; sensory ataxia       | Altered sensation L C6 dermatome; weakness below L elbow |
| <b>Initial laboratory results at or nearest to time of neurological symptom onset</b> |                          |                                                                                |                                                                    |                                              |                                                                                  |                                    |                                            |                                                          |
| Hb (g/L; 130-170)                                                                     | 125                      | 146                                                                            | 147                                                                | 135                                          | 166                                                                              | 153                                | 152                                        | 85                                                       |
| MCV (fL; 80-99)                                                                       | 95.8                     | 82.9                                                                           | 90                                                                 | 87.7                                         | 100.1                                                                            | 95.1                               | 92                                         | 107.5                                                    |
| Lymphs (x10 <sup>9</sup> /L; 1.2-3.65)                                                | 2.41                     | 2.35                                                                           | 2.2                                                                | 1.8                                          | 1.46                                                                             | 2.72                               | 1.16                                       | 3.53                                                     |
| Neuts (x10 <sup>9</sup> /L; 2-7.5)                                                    | 5.81                     | 6.31                                                                           | 3.1                                                                | 10.7                                         | 3.48                                                                             | 2.6                                | 3.14                                       | 1.32                                                     |
| Plt (x10 <sup>9</sup> /L; 150-400)                                                    | 252                      | 456                                                                            | 199                                                                | 425                                          | 256                                                                              | 244                                | 180                                        | 142                                                      |
| CRP (mg/L; 0-5.0)                                                                     | .                        | 9.9                                                                            | <5                                                                 | 6                                            | 71                                                                               | <5                                 | <5                                         | NR                                                       |
| Fibrinogen (g/L; 1.5-4.0)                                                             | NR                       | NR                                                                             | 4.1                                                                | NR                                           | 9.31                                                                             | 1.97                               | 2.76                                       | 2.86                                                     |
| D-Dimer (µg/L; 0-550)                                                                 | NR                       | 420                                                                            | NR                                                                 | NR                                           | NR                                                                               | NR                                 | NR                                         | 9100                                                     |
| Ferritin (µg/L; 30-400)                                                               | NR                       | 410                                                                            | 450                                                                | NR                                           | NR                                                                               | 190                                | NR                                         | NR                                                       |
| Other relevant results                                                                | Hep E serology positive  | NAD                                                                            | NAD                                                                | NAD                                          | NAD                                                                              | NAD                                | NAD                                        | NAD                                                      |
| <b>CSF</b>                                                                            |                          |                                                                                |                                                                    |                                              |                                                                                  |                                    |                                            |                                                          |
| White cell count (cells/µL; 0-5)                                                      | <1                       | 12                                                                             | 2                                                                  | 3                                            | 2                                                                                | 2                                  | <1                                         | NR                                                       |
| Protein (g/L; 0.13-0.45)                                                              | 0.3                      | 1.24                                                                           | 0.6                                                                | 0.5                                          | 0.6                                                                              | 0.26                               | 0.9                                        | NR                                                       |

|                                                             |                                       |                            |                            |                              |                            |                                |                  |                                                |
|-------------------------------------------------------------|---------------------------------------|----------------------------|----------------------------|------------------------------|----------------------------|--------------------------------|------------------|------------------------------------------------|
| Glucose (mmol/L; 2.2-4.2) (blood glucose) (mmol/L; 3.9-5.8) | NR                                    | NR                         | 4.0 (4.9)                  | NR                           | 3.4                        | 2.9 (4.4)                      | 3.7 (5.4)        | NR                                             |
| <b>Imaging</b>                                              |                                       |                            |                            |                              |                            |                                |                  |                                                |
| Neuroaxis                                                   | CT brain normal                       | MRI brain and spine normal | MRI brain and spine normal | CT brain normal              | MRI brain normal           | Nerve root enhancement         | MRI brain normal | MRI brain and spine normal                     |
| Chest                                                       | Normal                                | Abnormal                   | Normal                     | Normal                       | Normal                     | Normal                         | Normal           | Midzone opacification consistent with COVID-19 |
| <b>Other relevant investigations</b>                        |                                       |                            |                            |                              |                            |                                |                  |                                                |
| Neurophysiology                                             | Demyelinating with severe axonal loss | Demyelinating              | Not done                   | Demyelinating                | Demyelinating              | Demyelinating with axonal loss | Demyelinating    | Not done                                       |
| <b>Treatment</b>                                            |                                       |                            |                            |                              |                            |                                |                  |                                                |
| For neurological diagnosis                                  | IVIG                                  | IVIG                       | IVIG                       | IVIG; mechanical ventilation | IVIG                       | IVIG                           | IVIG             | IV methyl prednisolone                         |
| For COVID-19 infection                                      | Nil                                   | Nil                        | Nil                        | Nil                          | Intubation and ventilation | Nil                            | Nil              | Nil                                            |
| <b>Outcomes</b>                                             |                                       |                            |                            |                              |                            |                                |                  |                                                |
| Total duration of hospital admission (days)                 | 30                                    | 35                         | 10                         | 17                           | 46 (ongoing)               | 5                              | 7 (ongoing)      | 7                                              |
| GBS disability score (on discharge)                         | 4                                     | 2                          | 2                          | 2                            | 5                          | 2                              | 2                | NA                                             |

Footnote: 'NR' denotes not tested or no result. GBS: Guillian-Barre syndrome; IVIG: intravenous immunoglobulin NAD: nil abnormal detected. GBS disability score: 0 – healthy, 1 – minor symptoms or signs of neuropathy but capable of manual work/capable of running, 2 – able to walk 5m (across an open space) but incapable of manual work/running, 3 – able to walk with a stick, appliance or support (5m across an open space) 4 – bedridden or chairbound, 5 – requiring assisted ventilation (for any part of the day or night), 6 – dead.

**Table S1e. Five miscellaneous and uncharacterised patients**

| Patient                                                                   | 39                                                                           | 40                                                                                                                          | 41                                                                                                                                  | 42                                                                        | 43                                    |
|---------------------------------------------------------------------------|------------------------------------------------------------------------------|-----------------------------------------------------------------------------------------------------------------------------|-------------------------------------------------------------------------------------------------------------------------------------|---------------------------------------------------------------------------|---------------------------------------|
| Age (years)                                                               | 16                                                                           | 17                                                                                                                          | 27                                                                                                                                  | 40                                                                        | 20                                    |
| Gender (M/F)                                                              | F                                                                            | F                                                                                                                           | M                                                                                                                                   | M                                                                         | F                                     |
| Ethnicity                                                                 | Asian                                                                        | Black                                                                                                                       | White                                                                                                                               | Asian                                                                     | White                                 |
| Final neurological diagnosis                                              | Cranial nerve palsies associated with pseudotumour cerebri                   | Non-convulsive status epilepticus with widespread cortical MRI changes                                                      | Seizures; widespread microhaemorrhages in context of critical COVID-19 infection, hypertensive episodes and new AML on Gilteritinib | Pyogenic [ <i>Streptococcus intermedius</i> ] CNS infection post-COVID-19 | Myelopathy, cord ischaemia considered |
| Past medical history                                                      | Menorrhagia; normal BMI                                                      | Cornelia de Lange syndrome; epilepsy; dysmelia; hypertension; visual disturbance; GORD; Nissen fundoplication; gastrostomy. | Acute myeloid leukaemia (new)                                                                                                       | Interstitial keratitis; previous wrist and ankle synovitis                | None relevant                         |
| Initial COVID-19 symptoms                                                 | Abdominal pain; diarrhoea; maculopapular rash; headache; sore throat; fever. | Fever; cough; dyspnoea; household contacts                                                                                  | Fever                                                                                                                               | Fever; cough; shortness of breath; household contacts                     | Cough; coryza; fatigue; myalgia       |
| <b>Days from onset of COVID-19 symptoms to:</b>                           |                                                                              |                                                                                                                             |                                                                                                                                     |                                                                           |                                       |
| 1) Hospital admission                                                     | 6                                                                            | 3                                                                                                                           | 1                                                                                                                                   | 14                                                                        | 5                                     |
| 2) Onset of neurological symptoms                                         | 10                                                                           | 26                                                                                                                          | 6                                                                                                                                   | 14                                                                        | 6                                     |
| 3) ICU admission                                                          | N/A                                                                          | 5                                                                                                                           | 23                                                                                                                                  | 14                                                                        | N/A                                   |
| Main reason for hospital admission (neurological vs respiratory symptoms) | COVID-19 symptoms                                                            | Respiratory                                                                                                                 | Other                                                                                                                               | Neurological; generally unwell                                            | Neurological                          |
| Security of COVID-19 diagnosis                                            | Probable                                                                     | Definite                                                                                                                    | Definite                                                                                                                            | Possible                                                                  | Definite                              |
| Severity of COVID-19 infection                                            | Severe                                                                       | Critical                                                                                                                    | Critical                                                                                                                            | Mild                                                                      | Mild                                  |
| Duration of ICU stay                                                      | N/A                                                                          | >50 days ongoing                                                                                                            | 46                                                                                                                                  | 27                                                                        | N/A                                   |

|                                                                                       |                                                                                                                                      |                                                                                     |                             |                                                                                             |                                                                                                                  |
|---------------------------------------------------------------------------------------|--------------------------------------------------------------------------------------------------------------------------------------|-------------------------------------------------------------------------------------|-----------------------------|---------------------------------------------------------------------------------------------|------------------------------------------------------------------------------------------------------------------|
| <b>Initial neurological symptoms</b>                                                  | Diplopia; headache with features of raised ICP.                                                                                      | Seizures                                                                            | Seizures; weakness; fatigue | Return of fever; drenching night sweats; headache; vomiting; confusion; low conscious level | Headache; leg weakness and numbness; constipation                                                                |
| <b>Key neurological signs</b>                                                         | Evolving cranial nerve signs; progressive bilateral failure of abduction; weakness of left orbicularis oculi; no optic disc swelling | Low conscious level; possible cortical visual impairment; increased tone and clonus | Mild asymmetric weakness;   | Low conscious level; left-sided pyramidal weakness; brisk reflexes                          | Proximal lower limb weakness; absent lower abdominal and lower limb reflexes; flexor plantars; sensory level T10 |
| <b>Initial laboratory results at or nearest to time of neurological symptom onset</b> |                                                                                                                                      |                                                                                     |                             |                                                                                             |                                                                                                                  |
| Hb (g/L; 130-170)                                                                     | 102                                                                                                                                  | 95                                                                                  | 94                          | 94                                                                                          | 145                                                                                                              |
| MCV (fL; 80-99)                                                                       | 80.1                                                                                                                                 | 91                                                                                  | 94                          | 60                                                                                          | 84.9                                                                                                             |
| Lymphs (x10 <sup>9</sup> /L; 1.2-3.65)                                                | 1.7                                                                                                                                  | 1.1                                                                                 | 0.58                        | 1                                                                                           | 1.6                                                                                                              |
| Neuts (x10 <sup>9</sup> /L; 2-7.5)                                                    | 9.3                                                                                                                                  | 8.6                                                                                 | 0.74                        | 24                                                                                          | 2.8                                                                                                              |
| Plt (x10 <sup>9</sup> /L; 150-400)                                                    | 81                                                                                                                                   | 135                                                                                 | 81                          | 521                                                                                         | 238                                                                                                              |
| ESR (mm/hr; 1-20)                                                                     | NR                                                                                                                                   | NR                                                                                  | NR                          | 103                                                                                         | 23                                                                                                               |
| CRP (mg/L; 0-5.0)                                                                     | 294                                                                                                                                  | 100                                                                                 | 434                         | 248                                                                                         | 1.3                                                                                                              |
| Fibrinogen (g/L; 1.5-4.0)                                                             | NR                                                                                                                                   | NR                                                                                  | 8.59                        | 5.01                                                                                        | 4.15                                                                                                             |
| D-Dimer (normal range for assay)                                                      | 626 ng/mL (0-243)                                                                                                                    | NR                                                                                  | 22900 µg/L (0-550)          | 4970 µg/L (0-550)                                                                           | NR                                                                                                               |
| Ferritin (µg/L; 30-400)                                                               | NR                                                                                                                                   | 1367                                                                                | 6467                        | 1592                                                                                        | NR                                                                                                               |
| Phospholipid antibodies                                                               | NR                                                                                                                                   | NR                                                                                  | NR                          | NR                                                                                          | Negative                                                                                                         |
| Lupus anticoagulant                                                                   | NR                                                                                                                                   | NR                                                                                  | NR                          | NR                                                                                          | NR                                                                                                               |
| Other relevant results                                                                | ANA and ANCA negative; thyroid function normal                                                                                       | Neuronal and NMDA receptor antibodies negative                                      |                             | ANA negative; Ro antibodies equivocal                                                       | ANA and ANCA negative; AQP4 and MOG antibodies negative                                                          |
| <b>CSF</b>                                                                            |                                                                                                                                      |                                                                                     |                             |                                                                                             |                                                                                                                  |

|                                                             |                                                                                                                                                                                         |                                                                                                                                                                 |                                                                                                                                                                                                                                                           |                                                                                                                                                                                                                                                                                                                                  |                                                                                      |
|-------------------------------------------------------------|-----------------------------------------------------------------------------------------------------------------------------------------------------------------------------------------|-----------------------------------------------------------------------------------------------------------------------------------------------------------------|-----------------------------------------------------------------------------------------------------------------------------------------------------------------------------------------------------------------------------------------------------------|----------------------------------------------------------------------------------------------------------------------------------------------------------------------------------------------------------------------------------------------------------------------------------------------------------------------------------|--------------------------------------------------------------------------------------|
| White cell count (cells/ $\mu$ L; 0-5)                      | Two studies performed (2nd 5 days after 1st)<br>1 <sup>st</sup> : <1; 2 <sup>nd</sup> : <1                                                                                              | 3                                                                                                                                                               | Not done                                                                                                                                                                                                                                                  | 1 <sup>st</sup> : 4500 (95% lymphocytes); 2 <sup>nd</sup> : 13,920 (95% polymorphs); 3 <sup>rd</sup> : 405 (27% mononuclear cells, 73% polymorphs); 4 <sup>th</sup> : 40 (18% mononuclear cells, 82% polymorphs); 5 <sup>th</sup> : 121 (predominantly polymorphs); 6 <sup>th</sup> : 20 (75% mononuclear cells, 25% polymorphs) | <1                                                                                   |
| Protein (g/L; 0.13-0.45)                                    | 1 <sup>st</sup> : 0.3; 2 <sup>nd</sup> : 0.3                                                                                                                                            | 0.91                                                                                                                                                            |                                                                                                                                                                                                                                                           | 1 <sup>st</sup> : 2.18; 3 <sup>rd</sup> : 1.03; 4 <sup>th</sup> : 1.42; 5 <sup>th</sup> : 0.62; 6 <sup>th</sup> : 0.54;                                                                                                                                                                                                          | 0.24                                                                                 |
| Glucose (mmol/L; 2.2-4.2) (blood glucose) (mmol/L; 3.9-5.8) | 1 <sup>st</sup> : 3.1; 2 <sup>nd</sup> : 3.3                                                                                                                                            | 4.4                                                                                                                                                             |                                                                                                                                                                                                                                                           | 1 <sup>st</sup> : 0.7; 3 <sup>rd</sup> : NR; 4 <sup>th</sup> : 2.65; 5 <sup>th</sup> : 2.97; 6 <sup>th</sup> : 3.81                                                                                                                                                                                                              | 3.2                                                                                  |
| Other                                                       | Opening pressure: 1 <sup>st</sup> : 39 cm H2O; 2 <sup>nd</sup> : 27 cm H2O; CSF culture and viral PCR negative                                                                          | CSF culture and viral PCR negative                                                                                                                              |                                                                                                                                                                                                                                                           | Unmatched oligoclonal bands detected in CSF; CSF viral PCR negative, PCR for Streptococcus intermedius detected on CSF from day 5 of admission                                                                                                                                                                                   | Oligoclonal bands negative; CSF culture and viral PCR negative, including SARS-CoV-2 |
| <b>Micro/virology</b>                                       | Blood and urine cultures negative; Screening for other respiratory viruses negative                                                                                                     |                                                                                                                                                                 |                                                                                                                                                                                                                                                           |                                                                                                                                                                                                                                                                                                                                  |                                                                                      |
| <b>Imaging</b>                                              |                                                                                                                                                                                         |                                                                                                                                                                 |                                                                                                                                                                                                                                                           |                                                                                                                                                                                                                                                                                                                                  |                                                                                      |
| Neuroaxis                                                   | Dilated optic nerve sheaths and narrowed but patent transverse sinuses; consistent with raised intra-cranial pressure. No parenchymal changes or thrombosis of the head & neck vessels. | Extensive, symmetrical bilateral signal changes without restricted diffusion involving the cortices of the cerebral and cerebellar hemispheres and the thalami. | MRI brain - Extensive foci of susceptibility artefact predominantly at the grey white junctions of cerebral hemispheres. A few foci are noted in the cerebellum. Minimal associated signal changes but no perilesional oedema or significant mass-effect. | MRI brain - Bilateral ring / laminar enhancing cerebral and cerebellar lesions with diffusion restriction and partial haemorrhagic content, consistent with abscesses and apparent ventriculitis with either intraventricular pus and/or haemorrhage.                                                                            | MRI brain and spine normal                                                           |
| Chest                                                       | CXR - bilateral infiltrates                                                                                                                                                             |                                                                                                                                                                 | CT chest - extensive parenchymal changes showing typical appearances of COVID-19 infection                                                                                                                                                                | No COVID-19 changes                                                                                                                                                                                                                                                                                                              |                                                                                      |
| <b>Other relevant investigations</b>                        |                                                                                                                                                                                         |                                                                                                                                                                 |                                                                                                                                                                                                                                                           |                                                                                                                                                                                                                                                                                                                                  |                                                                                      |
| Echocardiogram                                              | Mild pericardial effusion, preserved ejection fraction 55%                                                                                                                              |                                                                                                                                                                 |                                                                                                                                                                                                                                                           |                                                                                                                                                                                                                                                                                                                                  |                                                                                      |
| <b>Treatment</b>                                            |                                                                                                                                                                                         |                                                                                                                                                                 |                                                                                                                                                                                                                                                           |                                                                                                                                                                                                                                                                                                                                  |                                                                                      |
| For neurological diagnosis                                  | Therapeutic lumbar puncture; acetazolamide                                                                                                                                              | Dexamethasone 4g QDS 2 days; methylprednisolone 30mg/kg 3 days, then oral prednisolone taper                                                                    | Levetiracetam                                                                                                                                                                                                                                             | Intubation and ventilation; various antimicrobials including ceftriaxone, linezolid, meropenem, intrathecal vancomycin; ICP monitoring; right then left                                                                                                                                                                          | Aspirin 75mg daily                                                                   |



|                                             |                                                 |                            |                                                           |                                               |                                    |
|---------------------------------------------|-------------------------------------------------|----------------------------|-----------------------------------------------------------|-----------------------------------------------|------------------------------------|
|                                             |                                                 |                            |                                                           | frontal EVDs; focal excision of brain abscess |                                    |
| For COVID-19 infection                      | Colchicine for myocarditis; oxygen              | Intubation and ventilation | Intubation and ventilation;                               | None additional                               | None required                      |
| Other                                       |                                                 |                            | Chemotherapy for AML - Gilteritinib                       |                                               |                                    |
| <b>Outcomes</b>                             |                                                 |                            |                                                           |                                               |                                    |
| Total duration of hospital admission (days) | 18                                              | Ongoing                    | Ongoing                                                   | Ongoing                                       | 5                                  |
| Outcome at last follow up                   | Incomplete recovery; improving; discharged home | No improvement; static     | Incomplete recovery; improving; undergoing rehabilitation | Incomplete recovery; improving                | Complete recovery; discharged home |

Footnote: CADASIL: Cerebral Autosomal Dominant Arteriopathy with Subcortical Infarcts and Leukoencephalopathy; TIA: transient ischaemic attack; ICU: intensive care unit; N/A: not applicable; Hb: haemoglobin; MCV: mean corpuscular volume; Lymphs: lymphocytes; Neuts: neutrophils; Plt: platelets; ESR: erythrocyte sedimentation rate; CRP: C-reactive protein; NR: no result; TSH: thyroid stimulating hormone; NMDA receptor: N-methyl-D-aspartate receptor; CSF: cerebrospinal fluid; PCR: polymerase chain reaction; CT: computed tomography; MRI: magnetic resonance imaging; CXR: chest X-ray; CTPA: CT pulmonary angiogram; ARDS: acute respiratory distress syndrome; EEG: electroencephalogram; IV: intravenous; IVMP: intravenous methylprednisolone; MGUS: monoclonal gammopathy of undetermined significance; ADEM: acute demyelinating encephalomyelitis; ANA: anti-nuclear antibodies; ANCA: anti-neutrophil cytoplasmic antibodies; ENA: extractable nuclear antigens; IgG: Immunoglobulin G; GAD: glutamic acid decarboxylase; DPPX: dipeptidyl-peptidase-like protein 6; LGII: leucine-rich glioma-inactivated 1; CASPR2: contactin-associated protein-like 2; MOG: myelin oligodendrocyte glycoprotein; AQP4: aquaporin-4; FDG PET: fluorodeoxyglucose positron emission tomography; IVIG: intravenous immunoglobulin; HTLV 1 and 2: Human T-cell Leukaemia Virus types 1 and 2; EMG: electromyogram; ICP: intracranial pressure; EVDL external ventricular drain; Standard viral PCR – herpes simplex viruses (1 + 2), varicella zoster, enterovirus +/- adenovirus, cytomegalovirus, Epstein-Barr Virus, parechovirus depending upon NHS trust/centre; N-Gene PCR (unvalidated test) for SARS-CoV-2 testing in CSF only where specified.
